# Local field potentials primarily reflect inhibitory neuron activity in human and monkey cortex

Bartosz Teleńczuk<sup>a,\*</sup>, Nima Dehghani<sup>b,c</sup>, Michel Le Van Quyen<sup>d</sup>, Sydney S. Cash<sup>e</sup>, Eric Halgren<sup>f</sup>, Nicholas G. Hatsopoulos<sup>g</sup>, Alain Destexhe<sup>a</sup>

<sup>a</sup>*Unité de Neurosciences, Information & Complexité, Centre National de la Recherche Scientifique, 91198 Gif-sur-Yvette, France*

<sup>b</sup>*Wyss Institute for Biologically-Inspired Engineering, Harvard University, Boston, USA*

<sup>c</sup>*New England Complex Systems Institute, Cambridge, USA*

<sup>d</sup>*L'Institut du Cerveau et de la Moelle Épinrière, UMR 1127, CNRS UMR 7225, Hôpital de la Pitié-Salpêtrière, Paris, France*

<sup>e</sup>*Department of Neurology, Massachusetts General Hospital and Harvard Medical School, USA.*

<sup>f</sup>*Multimodal Imaging Laboratory, Departments of Neurosciences and Radiology, University of California San Diego, USA.*

<sup>g</sup>*Department of Organismal Biology and Anatomy, Committee on Computational Neuroscience, University of Chicago, USA*

## Abstract

The local field potential (LFP) is generated by large populations of neurons, but unitary contribution of spiking neurons to LFP is not well characterized. We investigated this contribution in multi-electrode array recordings from the cerebral cortex of human and monkey by calculating the spike-triggered LFP average (st-LFP). The resulting st-LFPs were dominated by broad spatio-temporal components due to on-going activity, synaptic inputs and recurrent connectivity. To observe the local field of a single spike we applied spatial filtering. The filtered st-LFPs were limited to an area of 800  $\mu\text{m}$  from the neuron, and propagated at axonal speed, which is consistent with their unitary nature. In addition, we discriminated between putative inhibitory and excitatory neurons and found that the former dominated this unitary LFP contribution, consistently with previous findings in hippocampal slices. Thus, in human and monkey cortex, the LFP may primarily reflect inhibitory neuron activity.

## 1. Introduction

The information in neural systems is distributed across a large number of neurons. In order to understand how it is encoded, processed and transformed into actions, we need to monitor activities of significant fraction of the neuronal population (Georgopoulos et al., 1986). A popular measure of the population activity is the local field potential (LFP), which represents

\*Corresponding author

Email address: [mail@telenczuk.pl](mailto:mail@telenczuk.pl) (Bartosz Teleńczuk)

33 mass activity of neurons located in small volume around the recording site (Einevoll et al.,  
34 2013). Although LFP is easy to record, it has proven notoriously difficult to interpret and  
35 model (Einevoll et al., 2013; Buzsáki et al., 2012). These difficulties partially originate from  
36 the complexity of neuronal coding (Denker et al., 2011; Saleh et al., 2012), but they also result  
37 from the very nature of the LFP signal, which represents the neuronal activity only indirectly  
38 through the flow of the extracellular currents (Einevoll et al., 2013; Bédard et al., 2004). This  
39 current flow depends on a number of parameters such as the neuronal morphology (Lindén et al.,  
40 2010), membrane ion channels (Reimann et al., 2013), electric properties of the tissue (Bédard  
41 et al., 2004), brain area and cortical layer (Lindén et al., 2011) impeding the interpretation of  
42 the resulting LFP signal.

43 We have begun to understand some of the cellular origins of the LFP signal (Buzsáki et al.,  
44 2012). In particular, simultaneous recordings of spiking activity and LFP have proven to be very  
45 useful in studying its generation (Teleńczuk and Destexhe, 2015). The relation of spikes to LFP  
46 can be studied, for example, using spike-triggered LFP average (st-LFP) (Teleńczuk et al., 2015),  
47 which estimates the LFP associated with each spike of a single neuron. Such measures have been  
48 used to assess gamma-band synchronisation between neurons (Gray and Singer, 1989), to detect  
49 spike locking to phase of oscillatory LFP (Destexhe et al., 1999), to characterise the synaptic  
50 connectivity (Swadlow et al., 2002) and to study travelling cortical waves (Nauhaus et al., 2009).  
51 In addition, the st-LFP is modulated by the waking state (Destexhe et al., 1999) and stimulus  
52 contrast (Ray and Maunsell, 2011). However, the direct LFP contributions of transmembrane  
53 and synaptic currents triggered by a single spike (unitary LFP) could not be identified, because  
54 st-LFP can not discern them from on-going LFP activity and recurrent activity in the network  
55 (Einevoll et al., 2013; Nauhaus et al., 2012).

56 In this study, we aimed to differentiate the contributions of interneurons and pyramidal  
57 neurons to LFP recorded from awake humans and non-human primates. We anticipated that the  
58 long-duration recordings with dense grid of electrodes (Utah array) (Peyrache et al., 2012; Dickey  
59 et al., 2009) will allow us to separate LFP components of putative interneurons and pyramidal  
60 neurons. Since cell morphology and connectivity affect the LFP (Lindén et al., 2010, 2011), we  
61 expected that these two types of neurons should be associated with diverse LFP contributions.  
62 We found that for both populations st-LFPs are dominated by spatially and temporally broad

63 components, which might correspond to non-causal relation with the population activity. We  
 64 then estimated spatial filters adapted to the structure of on-going LFP, which allowed us to focus  
 65 on the focal contributions instead. Using this methods we could demonstrate for the first time  
 66 that the interneurons in comparison with pyramidal neurons, interneurons have a more dominant  
 67 unitary contribution to local LFP.

## 68 2. Results

69 We investigated the local field potential (LFP) contribution associated with a single spike  
 70 in human and non-human-primate cortex. The data were recorded from the temporal cortex of  
 71 patients who underwent a surgical procedure for the localisation of the epileptic foci (Peyrache  
 72 et al., 2012) and from the pre-motor cortex (PMd) of macaque monkey (Saleh et al., 2012)  
 73 (Figure 1A). The LFP and spiking activity (Figure 1B) were recorded with a 10-by-10 array of  
 74 intracortical electrodes (Utah array, interelectrode distance 400  $\mu$ m). Spikes of single neurons  
 75 were then discriminated by semi-automatic clustering (see Methods) and their relation to the LFP  
 76 was estimated with the spike-triggered LFP average (st-LFP), that is the average of short LFP  
 77 segments centered around each spike time. This procedure can be applied to LFP signals from  
 78 all electrodes, but always keeping firing of the same neuron as the reference. Thus we obtained a  
 79 spatio-temporal map of the LFP components coincident with a spike of a given neuron (Figure  
 80 1C).

81 The estimated st-LFPs are not confined to local neighbourhood of the trigger neuron, but  
 82 they spread rapidly through the entire array (Figure 1C, middle and bottom). In addition,  
 83 many components, even at distant electrodes, appear nearly simultaneously with a spike of the  
 84 reference neuron or they even precede the spike. Such components decay with long spatial scale  
 85 from the position of the neuron (Figure 1D-E). Such non-local and non-causal components can  
 86 not be interpreted as the field generated directly by the active neuron (via the post-synaptic  
 87 potentials), because most neurons synapse at distances no more than 1 mm (Holmgren et al.,  
 88 2003; Levy and Reyes, 2012).

89 Thus the st-LFP can not be interpreted as the LFP contribution of post-synaptic currents  
 90 triggered by a single spike either directly (mono-synaptically) or mediated through other neurons

(poly-synaptically). To explain the spatial and temporal spread of the st-LFP, we note that the spikes used to trigger the LFP average are generated within the network and that they are a by-product of extensive neuron-to-neuron correlations distributed spatially and temporally. In addition, many of the neurons share their synaptic inputs arriving from different brain areas, so that the st-LFP may also reflect the spatial distribution of synaptic projections and the time trace of the pre-synaptic currents. Finally, LFP captures signals electrically conducted by the neuronal tissue from other brain areas. Therefore, the spike-triggered LFP average extracts not only the contribution of the trigger neuron, but it sums all the pre- and post-synaptic currents from other neurons.

We developed a novel technique to recover the local contribution from the st-LFP. The technique is based on the notion that the LFP potentials triggered by a single neuron are superimposed on the baseline spatial correlations already present in the on-going LFP. Under this assumption we can remove the baseline by application of linear spatial filters, whose weights are adapted to the co-variance matrix of the on-going LFP. For correlation depending on space only through distance and not exact positions of the electrodes, the spatial filter would resemble the second spatial derivative (a laplacian) with the largest weights concentrated around the trigger electrode and its surroundings. The estimated filters adapted to the data manifest similar structure, but they also feature additional off-center components that are absent in the spatial derivative (Figure 2A).

Application of this method to st-LFP allowed to suppress the global components present in the entire array and keep only small components localised around the cell (Figure 2B, right). These components reach no further than 1 mm from the cell so they may originate from the synaptic currents directly evoked by the trigger neuron (Figure 2D, right). Similarly, spatial whitening recovered local LFP contributions in macaque pre-motor cortex (Figure 2E).

We compared the local st-LFP for the putative inhibitory (fast spiking, FS) and excitatory (regular spiking, RS) neurons discriminated on the basis of a spike waveshape (Peyrache et al., 2012; Dehghani et al., 2016) (Figure 2D). We found that in their close neighbourhood the FS neurons produced significantly stronger whitened st-LFP, but this amplitude difference diminished with distance (Figure 2D, right). This larger focal contributions of FS neurons could originate from denser spatial distribution of the synaptic terminals or the morphology of their axonal

121 collaterals as suggested by previous in vitro results (Bazélot et al., 2010). In contrast, we found  
122 that the raw st-LFP of RS and FS neurons were not significantly different (Figure 1D).

123 In addition, the whitened st-LFPs triggered by FS neurons peaked consistently before the  
124 RS-based st-LFPs (Figure 2D-E, cf. Figure 3). This difference could be explained by an extra  
125 di-synaptic contribution of the RS neurons: RS neurons would excite the inhibitory interneurons,  
126 which in turn would contribute to the LFP. In this model the shift in st-LFP latency reflects  
127 the delay due to synaptic transmission ( $\approx 2$  ms). Importantly, this explanation also accounts  
128 for the fact that the excitatory and inhibitory unitary LFPs have the same polarity. Identical  
129 conclusions were reached from unitary LFPs in hippocampal slices (Bazélot et al., 2010), which  
130 are thus entirely consistent with the present findings.

131 The latency of the st-LFPs averaged over electrodes equi-distant to the trigger neuron increased  
132 gradually with the distance (Figure 2A, left). This is shown more precisely when plotting the  
133 latency of the trough against the electrode distance from the trigger neuron (Figure 3A). The  
134 linear dependency between these measures is suggestive of propagation with constant speed,  
135 which can be estimated from the inverse slope of the linear fit. For the st-LFPs averaged over  
136 all neurons (Figure 2A) the estimated propagation speed was 2.84 m/s for FS and 0.77 m/s for  
137 RS; the difference between RS and FS was not significant (bootstrap test,  $n = 1000$  repetitions,  
138  $p > 0.01$ ).

139 The propagation speeds might reflect both the synaptic propagation (axonal conduction times  
140 and synaptic delays), as well as the passive propagation of electric field through the medium  
141 and indirect correlations between neurons. To focus on the direct effects, we analysed the  
142 propagation in the whitened st-LFP. We found that the propagation was slower in whitened  
143 st-LFP in comparison to the raw st-LFP (human: 0.51 m/s for RS neurons, 0.63 m/s, FS;  
144 monkey: 1.08 m/s, RS, 1.72 m/s, FS; Figure 3B). This may be due to the fact that the  
145 spatial filtering removes the effects of currents passively conducted through the tissue (volume  
146 conduction), which can propagate much faster than the synaptically-transmitted signals (Bédard  
147 and Destexhe, 2012). The combination of the nearly instantaneous (volume-conducted), and  
148 delayed (synaptically-propagated) st-LFP components may explain the higher overall propagation  
149 velocity in the non-whitened st-LFP. Interestingly, the propagation speed after whitening is  
150 consistent with action potential propagation speed in unmyelinated fibers (Debanne et al., 2011),

151 which further confirms that the whitened st-LFP represents unitary LFPs.

### 152 3. Discussion

153 We studied the relationship between neuronal activity and its surrounding electrical field by  
154 means of simultaneous recordings of single-unit spikes and the LFP signal. We found that the  
155 spike-triggered LFP can be described by a local component, which reflects single-neuron activity,  
156 and a diffuse component related to the baseline LFP correlations. Data-driven spatial filters  
157 recovered the local LFP field of each cell, the unitary LFP, which spreads at distances consistent  
158 with cortical anatomy and connectivity. The amplitude, peak latencies and propagation of such  
159 unitary LFP depended on the type of the neuron (inhibitory vs excitatory) used as the trigger.  
160 Specifically, the inhibitory neurons provide the largest contribution to the LFP in their close  
161 neighbourhood ( $< 1$  mm).

162 The spike-triggered LFP is an estimate of correlation between the (continuous) LFP signal  
163 and the (point-like) spike trains. As a correlation measure it can not differentiate the causal  
164 contributions of the spike and its post-synaptic consequences from the incidental correlations  
165 between LFP and spikes. In line with the argument, we identified st-LFP components that  
166 were both non-causal (i.e. preceded the spike onset) and non-local (appearing simultaneously in  
167 distant electrodes, Figure 1C). These components are not specific to the activity of the “trigger”  
168 neuron, but characterise the local population of neurons and electric properties of neural tissue  
169 (Einevoll et al., 2013).

170 Notwithstanding, we recovered the local correlates of spikes in the LFP using spatial filters  
171 adapted to the co-variance structure of on-going LFPs (Figure 2A-C). Similar techniques have  
172 been used as a pre-processing step of blind source separation methods (Hyvärinen et al., 2004)  
173 and to study neuronal responses to natural stimuli (Schwartz et al., 2006). There is also a  
174 similarity with the current source density method (CSD) for localising current sources of the  
175 LFP especially with the inverse CSD formulation (Pettersen et al., 2008; Łęski et al., 2011). An  
176 alternative, and possibly more direct, method of assessing the spike contribution to LFP consists  
177 in triggering a spike externally at random times (for example, by means of direct current injection)  
178 and recording the associated LFP signal. This technique might dissociate the times of spiking

179 from the neurons's synaptic inputs and activity of other neurons. However, such recordings in  
180 intact tissue are technically challenging and to the best of our knowledge have not yet been  
181 performed in monkey and humans.

182 The latency, propagation speed and the spatial extent of the whitened st-LFPs are consistent  
183 with the hypothesis that they measure the contribution of the post-synaptic currents initiated by  
184 the "trigger" spike (Figure 2 and 3). Alternatively, the axon-propagating action potential could  
185 produce similar LFP contribution, albeit at shorter spatial ranges constrained by the axonal  
186 arborisation (Mitzdorf, 1985). It has been also suggested that the LFP is at least partially  
187 generated by the dendritic spikes (Nicholson and Llinas, 1971), which could constitute another  
188 source of the observed st-LFP traces. The fact that the whitened st-LFP propagates with  
189 a different velocity, approaching unmyelinated axon propagation velocity, constitutes another  
190 evidence that it represents unitary LFPs.

191 Our results are consistent with the finding that the main contribution to the LFP in hippocampal  
192 slices (the unitary field potentials) is due to inhibitory neurons, while the contribution from  
193 excitatory neurons is mediated by interneurons, di-synaptically (Bazelon et al., 2010). Two of our  
194 findings suggest that these conclusions are valid for human and monkey: the putative inhibitory  
195 neurons produce larger signal in their close neighbourhood compared to the putative excitatory  
196 neurons; and the excitatory contribution to the LFP lags behind the inhibitory (Figure 2D-E).  
197 The latency difference might reflect an additional synaptic delay required for the di-synaptic  
198 activation of the mediating interneuron as suggested by Bazelon et al. (2010), but it was not  
199 as pronounced as reported in their in vitro study. It remains to be investigated whether this  
200 difference is specific to the experimental protocol of the present study (behaving awake subjects),  
201 preparation used (in vivo) or recorded brain area (pre-motor cortex and temporal cortex). In  
202 the present study, we can not directly address the origin of these cell-type differences. However,  
203 they are consistent with the differences in the morphologies of the neurons, most notably in the  
204 degree of axonal arborisation.

205 The spike-triggered LFP remains an essential method in answering how activities of single  
206 neurons are embedded in on-going rhythms (Ray and Maunsell, 2011). In addition, we demonstrated  
207 that it can be used to assess the specific contribution of the single neurons to the LFP and,  
208 indirectly, their synaptic connectivity. Future work might clarify whether this contribution is

specific to different brain areas, cortical layers or brain states and whether it might undergo dynamic changes during learning. Such an approach provides a new way to investigate the interactions between microscopic and macroscopic scales of cortical organisation.

## 4. Methods

### 4.1. Experimental methods

Human recordings were acquired from in-patient invasive monitoring of two patients with focal epilepsy. The neuroprobe (Utah array) was placed in layer II/III of the middle temporal gyrus. This array is silicon-based, made up of 96 microelectrodes with 400  $\mu\text{m}$  spacing, covering an area of  $4 \times 4$  mm. Data were sampled at 30 kHz (Cerebus Blackrock Microsystems). Single units were discriminated by using standard clustering methods. The data was recorded under normal behaviour (no specific task was administered during this recording). The data were scored into awake and slow-wave sleep periods based on EEG and video recordings. The full experimental protocol can be found in Peyrache et al. (2012).

The monkey recordings were performed during the night in the pre-motor cortex of macaque monkey (*Macaca mulatta*) implanted with Utah arrays described above. During a recording session, signals from 96 electrodes were amplified (gain of 5,000), band-pass filtered between 0.3 Hz and 7.5 kHz, and recorded digitally (14-bit) at 30 kHz per channel using a Cerebus acquisition system (Blackrock Microsystems). Spike waveform data were sorted off-line (Plexon, Dallas, TX) using a user-defined template. All spike waveforms whose mean squared error from this template fell below a user-defined threshold were classified as belonging to that unit. The full experimental protocol can be found in Dickey et al. (2009).

We discriminated the putative regular-spiking (RS) and fast-spiking (FS) neurons based on their extracellular spike features. The details of the procedure for human and monkey data were described elsewhere (Peyrache et al., 2012; Dehghani et al., 2016).

### 4.2. Data analysis

We calculated the spike-triggered average of the LFP (st-LFP) in order to estimate the contribution of a single spike to LFP (Schwartz et al., 2006). First, we calculated the average of



236 short segments of the LFP centered around each spike time of a single trigger neuron. Next, we  
237 repeated this process across LFP electrodes to obtain a spatio-temporal st-LFP:

$$\text{st-LFP}_i(t) = \frac{1}{n_{\text{sp}}} \sum_{k=1}^{n_{\text{sp}}} \text{LFP}_i(t - t_k) \quad (1)$$

238 where  $i = 1..96$  are the indices of the electrodes and  $\{t_k\}_{k=1}^{n_{\text{sp}}}$  are all  $n_{\text{sp}}$  spike times of the trigger  
239 neuron. To avoid spike artifacts, the LFP signal for the electrode with spikes of the trigger  
240 neuron was removed from the data. For the purpose of visualisation (Figure 1C and Figure 2C)  
241 the missing electrodes were replaced with the average of neighbour electrodes.

242 We estimated the peak latencies in the population-averaged whitened st-LFP (Figure 3D-E)  
243 by finding the global minimum of the st-LFP in the time-window of  $[-10, 15]$  ms. To estimate  
244 the peak latency of single-neuron st-LFP (Figure 3A) we fitted an asymmetric Gaussian in the  
245 time range  $[-10, 25]$  ms:

$$f(t) = y_0 + A \begin{cases} \exp(-(t - \delta)^2/\sigma_1^2) & \text{if } t \geq \delta \\ \exp(-(t - \delta)^2/\sigma_2^2) & \text{if } t < \delta \end{cases} \quad (2)$$

246 where the baseline  $y_0$ , the amplitude  $A$ , the left and right widths  $\sigma_1$ ,  $\sigma_2$  and the latency  $\delta$  are  
247 fitted using nonlinear least-squares method (Levenberg-Marquardt algorithm).

248 To whiten the st-LFPs we first calculated the co-variance matrix of the on-going band-pass  
249 filtered (15 – 300 Hz) LFP signals  $(\mathbf{C}_{\text{LFP}})_{ij} = \langle \text{LFP}_i(t) \text{LFP}_j(t) \rangle_t$  (where  $\langle \cdot \rangle_t$  denotes temporal  
250 averaging). The whitening matrix  $\mathbf{W}$  is calculated by the inverse square root of  $\mathbf{C}_{\text{LFP}}$  (Hyvärinen  
251 et al., 2004):

$$\mathbf{W} = \mathbf{C}_{\text{LFP}}^{-1/2} = \mathbf{E} \mathbf{D}^{-1/2} \mathbf{E}^T, \quad (3)$$

252 where  $\mathbf{E}$  is a matrix of eigenvectors of  $\mathbf{C}_{\text{LFP}}$  and  $\mathbf{D}$  is a diagonal matrix with inverse square  
253 roots of eigenvalues  $\lambda_i$  on its diagonal ( $(\mathbf{D})_{ii} = 1/\sqrt{\lambda_i}$ ,  $(\mathbf{D})_{ij} = 0$ ).

254 Given the matrix  $\mathbf{W}$  the whitening operation amounts to the matrix product of  $\mathbf{W}$  with the  
255 spike-triggered LFP:

$$\text{st-LFP}_i^w = \sum_{j=1}^{96} (\mathbf{W})_{ij} \text{st-LFP}_j \quad (4)$$

where st-LFP<sup>w</sup>s are the whitened st-LFPs.

In pre-processing steps, the LFP signals were band-pass filtered 15 – 300 Hz. The filtering was applied in Fourier domain where its response was 1 for all frequencies in the pass-band and 0 in stop-band. To avoid ringing artifacts, at the corner frequencies the response decayed to 0 with a profile of a Gaussian with width of 10 Hz.

## Acknowledgments

Research funded by Centre National de la Recherche Scientifique (CNRS, France), European Community Future and Emerging Technologies program (BrainScales FP7-269921; The Human Brain Project FP7-604102), National Institutes of Health (NIH grants 5R01NS062092, R01EB009282 and R01NS045853, R01MH099645) and Office of Naval Research (MURI grant number N00014-13-1-0672).

## References

- Bazélot, M., Dinocourt, C., Cohen, I., Miles, R., 2010. Unitary inhibitory field potentials in the CA3 region of rat hippocampus. *J. Physiol. (Lond.)* 588 (Pt 12), 2077–2090.
- Bédard, C., Destexhe, A., 2012. Modeling local field potentials and their interaction with the extracellular medium. In: Brette, R., Destexhe, A. (Eds.), *Handbook of Neural Activity Measurement*. Cambridge University Press, Cambridge, pp. 136–191.
- Bédard, C., Kröger, H., Destexhe, A., 2004. Modeling extracellular field potentials and the frequency-filtering properties of extracellular space. *Biophys. J.* 86 (3), 1829–1842.
- Buzsáki, G., Anastassiou, C. A., Koch, C., 2012. The origin of extracellular fields and currents—EEG, ECoG, LFP and spikes. *Nat. Rev. Neurosci.* 13 (6), 407–420.
- Debanne, D., Campanac, E., Bialowas, A., Carlier, E., Alcaraz, G., 2011. Axon Physiology. *Physiol. Rev.* 91 (2), 555–602.

278 Dehghani, N., Peyrache, A., Telenczuk, B., Le Van Quyen, M., Halgren, E., Cash, S. S.,  
279 Hatsopoulos, N. G., Destexhe, A., 2016. Dynamic Balance of Excitation and Inhibition in  
280 Human and Monkey Neocortex. *Sci. Rep.* 6, 23176.

281 Denker, M., Roux, S., Lindén, H., Diesmann, M., Riehle, A., Grün, S., 2011. The Local Field  
282 Potential Reflects Surplus Spike Synchrony. *Cereb. Cortex* 21 (12), 2681–2695.

283 Destexhe, A., Contreras, D., Steriade, M., 1999. Spatiotemporal analysis of local field potentials  
284 and unit discharges in cat cerebral cortex during natural wake and sleep states. *J. Neurosci.*  
285 19 (11), 4595–4608.

286 Dickey, A. S., Suminski, A., Amit, Y., Hatsopoulos, N. G., 2009. Single-unit stability using  
287 chronically implanted multielectrode arrays. *J. Neurophysiol.* 102 (2), 1331–1339.

288 Einevoll, G. T., Kayser, C., Logothetis, N. K., Panzeri, S., 2013. Modelling and analysis of  
289 local field potentials for studying the function of cortical circuits. *Nat. Rev. Neurosci.* 14 (11),  
290 770–785.

291 Georgopoulos, A. P., Schwartz, A. B., Kettner, R. E., 1986. Neuronal population coding of  
292 movement direction. *Science* 233 (4771), 1416–1419.

293 Gray, C. M., Singer, W., 1989. Stimulus-specific neuronal oscillations in orientation columns of  
294 cat visual cortex. *Proc. Natl. Acad. Sci. U.S.A* 86 (5), 1698–1702.

295 Holmgren, C., Harkany, T., Svennenfors, B., Zilberter, Y., 2003. Pyramidal cell communication  
296 within local networks in layer 2/3 of rat neocortex. *J. Physiol. (Lond.)* 551 (Pt 1), 139–153.

297 Hyvärinen, A., Karhunen, J., Oja, E., 2004. Independent Component Analysis. John Wiley &  
298 Sons, New York.

299 Łęski, S., Pettersen, K. H., Tunstall, B., Einevoll, G. T., Gigg, J., Wójcik, D. K., 2011.  
300 Inverse current source density method in two dimensions: inferring neural activation from  
301 multielectrode recordings. *Neuroinformatics* 9 (4), 401–425.

302 Levy, R. B., Reyes, A. D., 2012. Spatial profile of excitatory and inhibitory synaptic connectivity  
303 in mouse primary auditory cortex. *J. Neurosci.* 32 (16), 5609–5619.

304 Lindén, H., Pettersen, K. H., Einevoll, G. T., 2010. Intrinsic dendritic filtering gives low-pass  
305 power spectra of local field potentials. *J. Comput. Neurosci.* 29 (3), 423–444.

306 Lindén, H., Tetzlaff, T., Potjans, T. C., Pettersen, K. H., Grün, S., Diesmann, M., Einevoll,  
307 G. T., 2011. Modeling the spatial reach of the LFP. *Neuron* 72 (5), 859–872.

308 Mitzdorf, U., 1985. Current source-density method and application in cat cerebral cortex:  
309 investigation of evoked potentials and EEG phenomena. *Physiol. Rev.* 65 (1), 37–100.

310 Nauhaus, I., Busse, L., Carandini, M., Ringach, D. L., 2009. Stimulus contrast modulates  
311 functional connectivity in visual cortex. *Nat. Neurosci.* 12 (1), 70–76.

312 Nauhaus, I., Busse, L., Ringach, D. L., Carandini, M., 2012. Robustness of traveling waves in  
313 ongoing activity of visual cortex. *J. Neurosci.* 32 (9), 3088–3094.

314 Nicholson, C., Llinas, R., 1971. Field potentials in the alligator cerebellum and theory of their  
315 relationship to Purkinje cell dendritic spikes. *J. Neurophysiol.* 34 (4), 509–531.

316 Pettersen, K. H., Hagen, E., Einevoll, G. T., 2008. Estimation of population firing rates and  
317 current source densities from laminar electrode recordings. *J. Comput. Neurosci.* 24 (3),  
318 291–313.

319 Peyrache, A., Dehghani, N., Eskandar, E. N., Madsen, J. R., Anderson, W. S., Donoghue, J. A.,  
320 Hochberg, L. R., Halgren, E., Cash, S. S., Destexhe, A., 2012. Spatiotemporal dynamics of  
321 neocortical excitation and inhibition during human sleep. *Proc. Natl. Acad. Sci. U.S.A.* 109 (5),  
322 1731–1736.

323 Ray, S., Maunsell, J. H. R., 2011. Network rhythms influence the relationship between  
324 spike-triggered local field potential and functional connectivity. *J. Neurosci.* 31 (35),  
325 12674–12682.

326 Reimann, M. W., Anastassiou, C. A., Perin, R., Hill, S. L., Markram, H., Koch, C., 2013. A  
327 biophysically detailed model of neocortical local field potentials predicts the critical role of  
328 active membrane currents. *Neuron* 79 (2), 375–390.

- 329 Saleh, M., Takahashi, K., Hatsopoulos, N. G., 2012. Encoding of coordinated reach and grasp  
330 trajectories in primary motor cortex. *J. Neurosci.* 32 (4), 1220–1232.
- 331 Schwartz, O., Pillow, J. W., Rust, N. C., Simoncelli, E. P., 2006. Spike-triggered neural  
332 characterization. *J. Vision* 6 (4), 484–507.
- 333 Swadlow, H. A., Gusev, A. G., Bezdudnaya, T., 2002. Activation of a cortical column by a  
334 thalamocortical impulse. *J. Neurosci.* 22 (17), 7766–7773.
- 335 Teleńczuk, B., Baker, S. N., Kempter, R., Curio, G., 2015. Correlates of a single cortical action  
336 potential in the epidural EEG. *Neuroimage* 109, 357–367.
- 337 Teleńczuk, B., Destexhe, A., 2015. Local field potential, relationship to unit activity. In: Jaeger,  
338 D., Jung, R. (Eds.), *Encyclopedia of Computational Neuroscience*. Springer, New York, pp.  
339 1579–1584.

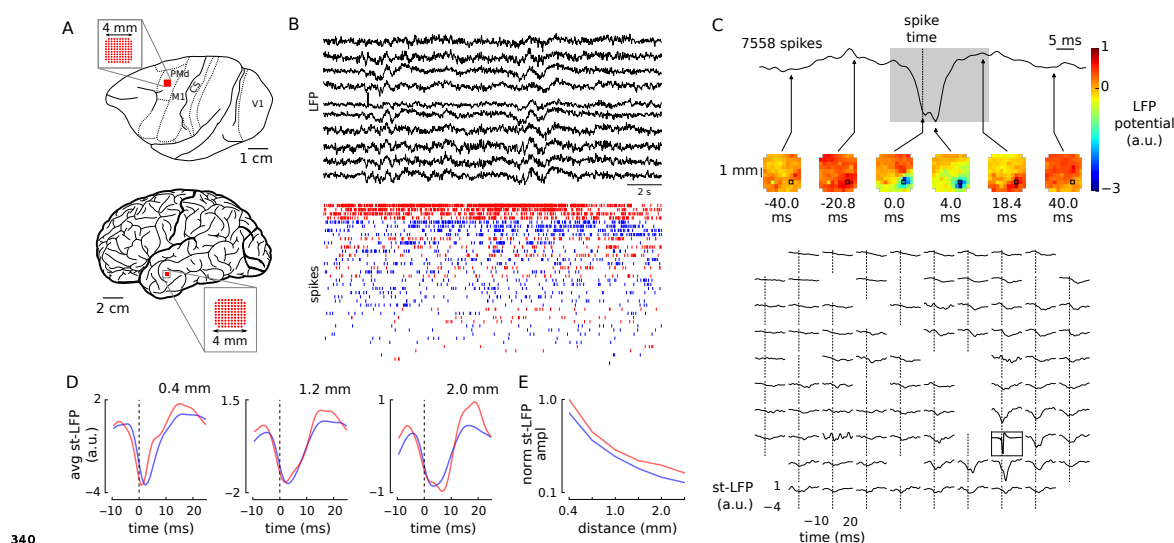

**Figure 1: Spikes of single neurons are associated with spatially diffuse and non-causal LFP patterns.**

(A) Local field potentials and spikes were measured in the premotor cortex of macaques (top) and temporal cortex of human subjects (bottom) using Utah arrays. (B) LFP (top, subset of LFPs recorded simultaneously from macaque pre-motor cortex) and spikes (bottom, subset of neurons) obtained from Utah array. Neurons were classified into regular spiking (bottom, blue) and fast spiking (red) types based on spike waveshape. (C) Spatio-temporal spike-triggered LFP average (st-LFP) in human temporal cortex. *Top*: Average of the st-LFPs (band-pass filtered 15 – 300 Hz, average of 7558 spike-triggered segments) from the electrodes neighbouring with the trigger neuron. *Middle*: A color map of st-LFP amplitudes at selected time lags around the spike. The values for missing electrodes were linearly interpolated. *Bottom*: The st-LFP from all valid electrodes of the array plotted in time (plotting window adjusted to the gray-shaded segment in top panel). The st-LFP at the neuron position (black rectangle) was replaced with the spike waveform (amplitude normalised). Most st-LFPs express non-causal components preceding the spike (spike onset shown with vertical dotted line). (D) st-LFPs averaged for all electrodes separated from the trigger neuron with same distance (3 distances: 0.4 mm, 1.2 mm, 2 mm shown from left to right) and for all neurons classified as inhibitory (red) or excitatory (blue). (E) The st-LFP trough amplitude as a function of the distance from neuron to LFP electrode.

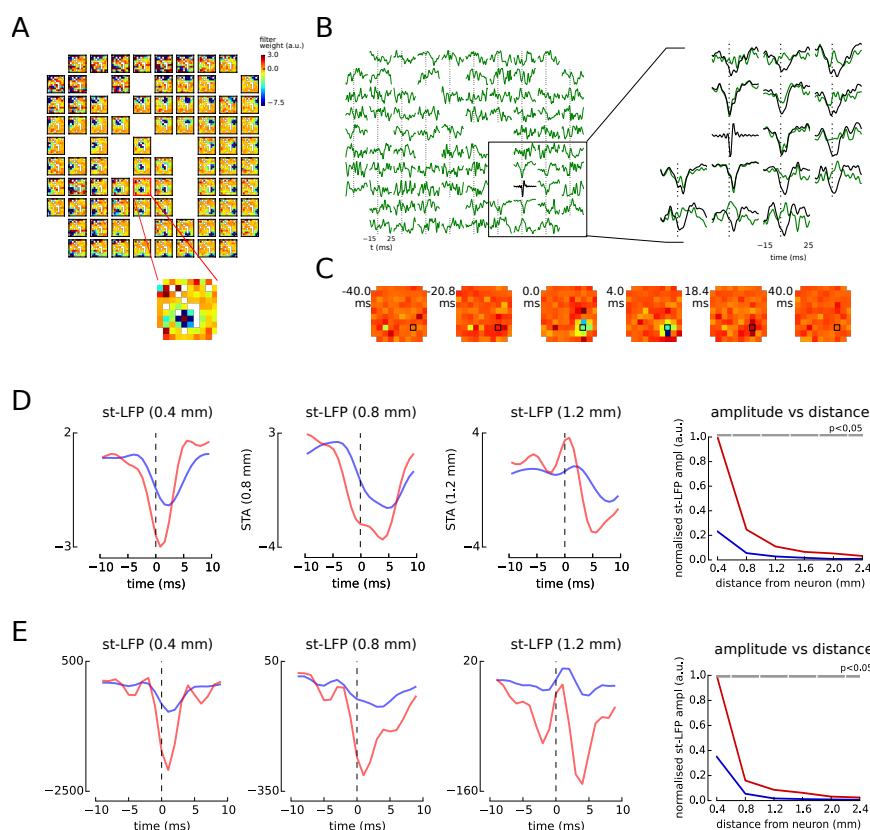

**Figure 2: The focal LFP of fast spiking (FS) and regular spiking (RS) neurons recovered by spatial decorrelation (whitening).** (A) Spatial filters designed to decorrelate (whiten) the LFP signals. Colors show filter weights associated with each electrode. *Inset:* Scaled-up heatmap of weights to whiten a single st-LFP (single row of whitening matrix). (B) Whitened st-LFPs of a single neuron shown in prior (black) and after whitening (green). *Right:* close-up of the whitened st-LFPs enclosed in black rectangle. Most st-LFPs are suppressed after spatial whitening and only st-LFPs directly adjoining the neuron are conserved. (C) Spatial maps of whitened st-LFP (top, compare with Figure 1C). (D) The population-averaged st-LFPs after whitening for human. Whitened st-LFPs averaged across neurons and electrodes at three distances from the trigger neuron (0.4 mm, 0.8 mm, 1.2 mm; compare with Figure 1D). st-LFP trough amplitude as a function of the distance between the neuron and LFP electrode (cf. Figure 1E). The gray horizontal bars at the top indicate significant differences between RS and FS neurons (bootstrap test,  $p < 0.05$ ). The st-LFPs triggered on spikes of fast spiking neurons (red) are of higher amplitude and faster spatial decay (right-most panel). (E) Same as (D) for monkey.

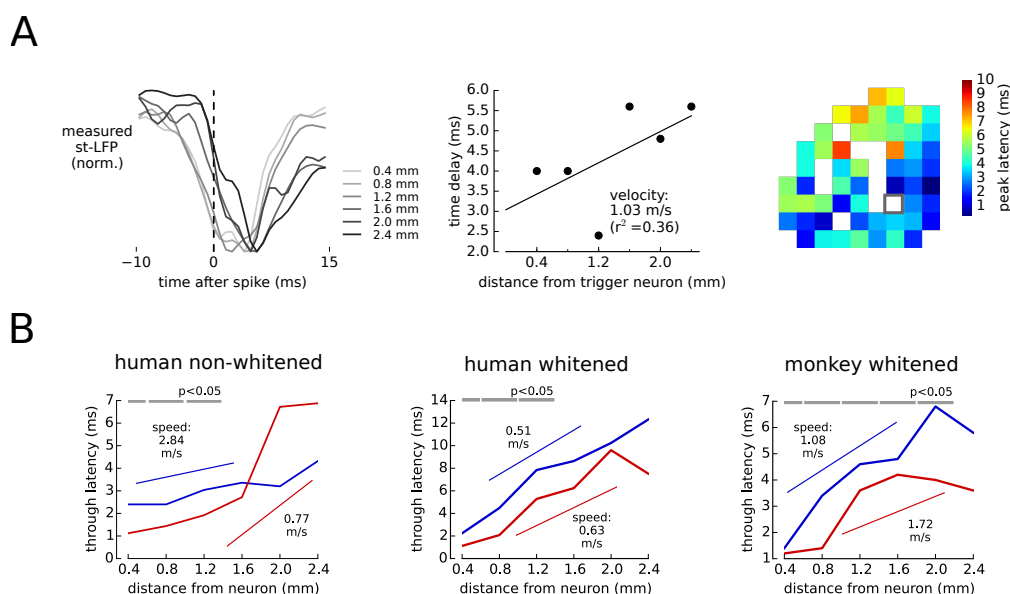

Figure 3: **st-LFPs propagate across cortex.** (A) Propagation of the raw st-LFP across the electrode array. From left to right: single-neuron st-LFPs averaged over all electrodes with the same distance from the trigger neuron; the latency of averaged st-LFP troughs (dots) and the linear fit (solid line); the latency of st-LFPs from each electrode as a heatmap (blank squares are due to missing electrodes or absence of pronounced st-LFP trough). The latencies increase with the distance supporting the hypothesis of spike-evoked LFP propagation. (B) The propagation of population-averaged traces. The trough latencies of whitened st-LFPs shown in Figure 1D (left), 2C (middle) and 2D (right) increase with distance. In whitened st-LFPs the RS latencies are consistently larger than FS at all distances (horizontal bars indicate significant difference between RS and FS neurons, bootstrap test,  $p < 0.01$ ). The propagation velocity estimated from the inverse slope of the linear fit (thin line) is faster in raw human st-LFP (left) than the whitened human st-LFP (middle). The difference in propagation speeds between FS and RS neurons is not significant (bootstrap,  $p > 0.01$ )
